1 **Influenza C and D viral load in cattle correlates with bovine respiratory disease (BRD):**  
2 **Emerging role of orthomyxoviruses in the pathogenesis of BRD**

3 **Ruth H. Nissly<sup>1</sup>, Noriza Zaman<sup>1</sup>, Puteri Ainaa S. Ibrahim<sup>1</sup>, Kaitlin McDaniel<sup>1</sup>, Levina Lim<sup>1</sup>,**  
4 **Jennifer N. Kiser<sup>2</sup>, Ian Bird<sup>1</sup>, Shubhada K. Chothe<sup>1</sup>, Gitanjali L. Bhushan<sup>1</sup>, Kurt Vandegrift<sup>3</sup>,**  
5 **Holly J. Neibergs<sup>2</sup>, and Suresh V. Kuchipudi<sup>1,4\*</sup>**

6

7 <sup>1</sup>Penn State Animal Diagnostic Laboratory, Department of Veterinary and Biomedical Sciences, The  
8 Pennsylvania State University, University Park, PA, USA

9

10 <sup>2</sup>Department of Animal Sciences and Center for Reproductive Biology, Washington State University,  
11 Pullman, WA, USA

12

13 <sup>3</sup>The Center for Infectious Disease Dynamics, Department of Biology, The Pennsylvania State  
14 University, University Park, PA 16802, USA

21

22 <sup>4</sup>The Center for Infectious Disease Dynamics, The Pennsylvania State University, University Park,  
23 PA 16802, USA

24

25 **\* Correspondence:**  
26 Corresponding Author  
27 [skuchipudi@psu.edu](mailto:skuchipudi@psu.edu)

28

29

30 **Keywords: BRDC, BRD, IDV, ICV, Orthomyxoviruses, cattle**

31

32 **Running title: Higher influenza viral load correlates with BRD**

33

34

35

36

37

38

39 **Abstract**

40 Bovine respiratory disease (BRD) is the costliest disease affecting the cattle industry globally.  
41 Despite decades of research, the pathophysiology of BRD is not yet fully understood. It is widely  
42 believed that viruses predispose cattle to bacterial infection by causing direct damage to the  
43 respiratory tract and interfering with the immune system, leading to bacterial pneumonia. BRD  
44 remains a major challenge despite extensive vaccination against all major viral pathogens associated  
45 with the disease. Orthomyxoviruses (Influenza C & D viruses), have recently been found to infect  
46 cattle throughout the United States and are implicated to play a role in BRD. Here, we use the largest  
47 cohort study to date to investigate the association of influenza viruses in cattle with BRD. Cattle  
48 (n=599) from 3 locations were individually observed and scored for respiratory symptoms using the  
49 McGuirk scoring system. Deep pharyngeal and mid-nasal swabs were collected from each animal  
50 and were tested quantitatively for bovine viral diarrhea virus, bovine herpesvirus 1, bovine  
51 respiratory syncytial virus, bovine coronavirus, influenza C virus (ICV) and influenza D virus (IDV)  
52 by real-time PCR. Cattle that have higher viral loads of IDV and ICV also have greater numbers of  
53 co-infecting viruses than controls. More strikingly, in BRD-symptomatic cattle, the geometric mean  
54 of detectable IDV viral RNA was nearly 2 logs higher in co-infected animals ( $1.30 \times 10^4$ ) than those  
55 singly infected with IDV ( $2.19 \times 10^2$ ). This is strong evidence that viral coinfections can lead to higher  
56 replication of IDV. Our results strongly suggest that orthomyxoviruses may be significant  
57 contributors to BRD.

58

59

60

61

62

## 63 1 Introduction

64 Despite decades of study and attempts at control and prevention, bovine respiratory disease  
65 (BRD) remains a major cause of morbidity, mortality, and economic losses in the cattle industry  
66 worldwide. BRD is a polymicrobial infection and it accounts for approximately 70–80% of the cattle  
67 feedlot morbidity in the USA (1). Losses are estimated to be \$23.60 per calf and they add up to an  
68 annual loss of over one billion dollars to the US cattle industry alone (2). BRD also results in the use  
69 of widespread therapeutics and antibiotics in feedlots, which increasingly raises public health  
70 concerns of promoting antibiotic resistance (3, 4).

71 The pathophysiology of BRD involves complex interactions between host, pathogen,  
72 environment, genetic and management factors. In feedlot cattle, BRD is initiated by viral infection  
73 exacerbated by stress due to travel which is typically followed by secondary infection by commensal  
74 bacteria (5). Viral infection can cause increased susceptibility to secondary bacterial infections by  
75 immunosuppression or by inflammation causing damage to the epithelium of upper airways and  
76 injuring lung parenchyma. Such damage facilitates the migration of bacterial pathogens and  
77 colonization of the lower respiratory tract. If unresolved, continued BRD advances to lower airway  
78 regions, eventually causing bronchopneumonia. Many viral pathogens have been implicated in BRD,  
79 including bovine viral diarrhea virus (BVDV), bovine herpesvirus 1 (BoHV-1), bovine respiratory  
80 syncytial virus (BRSV), bovine parainfluenza 3 (PI-3), and more recently bovine coronavirus  
81 (BCoV). In sum, more than a dozen pathogenic bacterial and viral agents have been implicated in  
82 BRD establishment and progression, prompting the development of vaccines to aid in protecting  
83 against infection with several of these organisms. However, vaccination and other prevention  
84 strategies have failed to stop the disease and alleviate these losses in production. Both bacterial and  
85 viral coinfections are common in BRD, so it can be difficult to directly implicate any one pathogen.

86           The latest additions to the list of BRD-associated viruses include a class of virus previously  
87 unknown to infect cattle. Orthomyxoviruses enveloped viruses with segmented negative-sense  
88 single-stranded RNA genomes, including seven genera, four of which are influenza viruses. Influenza  
89 D virus (IDV) is the most recently discovered member of the family and it is well established that  
90 cattle are the definitive host for IDV (6). IDV RNA has been found in nasal secretions from cattle  
91 with respiratory disease throughout North America (2, 6-10), Europe (11-14), and East Asia (15, 16).  
92 Although infection with IDV causes only mild respiratory disease in experimentally infected calves  
93 (17-20), a retrospective metagenomic BRD case-control study analysis of a set of 100 calves  
94 identified a positive correlation between the presence of IDV genomic RNA in nasal swabs and BRD  
95 symptoms in cattle (9). Additional retrospective case-control studies of feedlot cattle in Canada (10),  
96 the USA, and Mexico (2) have also found a higher prevalence of IDV in cattle with symptomatic  
97 BRD compared with healthy controls from similar sample sizes (n=93 and n=116). However, it  
98 remains unclear how the mild pathogenic effects of IDV infection would cause BRDC.

99           In 2016, a second orthomyxovirus, influenza C virus (ICV), was detected in cattle with BRD  
100 in the midwestern USA (21, 22). ICV was previously unknown to infect cattle, and it is uncertain  
101 how long ICV has existed in the cattle population. ICV has been identified in Alberta, Canada, and  
102 Texas, Oklahoma, Missouri, Colorado, Montana, Nebraska, Minnesota and Kansas, USA (10, 22).  
103 Understanding the potential role of ICV in disease in cattle is in its infancy. ICV was first identified  
104 in animals with BRD (21), suggesting that ICV may have an associative role in BRD. However, a  
105 recent retrospect case-control metagenomics study of feedlot cattle respiratory tract samples found no  
106 association between cattle with BRD and corresponding samples with reads mapping to ICV (10).  
107 Additional exploration of the role of ICV in cattle health is needed to understand the significance of  
108 this orthomyxovirus.

109           The potential association of these orthomyxoviruses with BRD could illuminate more about  
110 BRD pathogenesis. Previous studies of IDV/ICV in case-control cattle have included limited sample  
111 sizes and had mixed numbers of subjects from different premises. We hypothesized that exploring a  
112 larger sample-size from individual premises would provide better clarity about IDV/ICV and  
113 relationship to BRD by reducing the confounding variation contributed by differing management  
114 practices and conditions at separate premises. Since cattle serve as a natural reservoir of IDV, the  
115 mere presence of the virus may not correlate with disease. Hence, we believed that quantitative  
116 evaluation of both health status and virus copy numbers could provide a robust statistical evaluation  
117 of potential correlation of IDV or ICV with BRD. Here, probe-based real-time RT-PCRs were  
118 utilized to screen for these viruses in deep nasal swabs from cattle. This technique provides the  
119 ability to identify viral genomic RNA in a sensitive, specific and quantitative manner. Three separate  
120 case-control cohorts of approximately 200 animals each were screened to retroactively determine the  
121 prevalence of IDV and ICV in US cattle from 2011 to 2014, making this the largest case-control  
122 investigation examining the relationship between these new orthomyxoviruses and BRD.

## 123 **2. Materials and Methods**

### 124 **2.1 Subjects/scoring/sample collection.**

125           All animal care and sample collections were approved and performed in accordance with the  
126 Institutional Animal Care and Use Committee at Washington State University (#04110). Cattle from  
127 three locations were selected for the study. One study cohort (n=200) originated from calf-raising  
128 operations in New Mexico state (23) consisting of female Holstein calves aged 23 to 76 days,  
129 sampled from August to October 2011. The other two cohorts were from beef cattle feedlots (24).  
130 One feedlot cohort (n=200) located in the state of Colorado consisted of male cattle, 98.5% Angus  
131 and 1.5% Red Angus; animals were sampled between October to November 2012. The third cohort

132 (n=199) was from a beef cattle feedlot in Washington state with female cattle, 60.8% Angus, 14.1%  
133 Charolais, 18.1% crossbred, 4.5% Red Angus, and 2.5% Hereford; 97% of animals were sampled  
134 from January to July 2014, and 3% were sampled in October 2013. Each animal was individually  
135 observed and scored for respiratory health symptoms using the McGuirk scoring system (McGuirk,  
136 2008), with health scores ranging from 0 to 12. Animals with McGuirk health scores  $\geq 5$  were  
137 classified as clinically affected BRD cases and those with scores  $\leq 4$  were classified as healthy  
138 controls. One deep pharyngeal and one mid-nasal swab were collected from each animal and pooled  
139 together in the viral transport medium.

## 140 **2.2 Assay for viral agents.**

141 One aliquot of each pooled swab sample was tested for BRSV, BoHV-1, BCoV, and BVDV  
142 by the California Animal Health and Food Safety Lab System (Davis, CA) using real-time PCR or  
143 RT-PCR. Viral nucleic acids were extracted from a separate aliquot of each nasal swab using the  
144 MagMAX-96 Pathogen RNA/DNA kit following the manufacturer's instructions. Nucleic acids were  
145 tested for PI3, IDV, and ICV using real-time RT-PCR on a 7500 Fast Real-Time PCR System  
146 (Applied Biosystems, Foster City, CA) using previously reported primer and probe sets  
147 (Supplemental Table A) (21, 25, 26) purchased from Integrated DNA Technologies (Coralville,  
148 Iowa). For PI3, 1  $\mu\text{L}$  of the template was used in a 25  $\mu\text{L}$  reaction using the QuantiFast Probe RT-  
149 PCR Kit (Qiagen, Inc., Valencia, CA) with 0.4  $\mu\text{M}$  of each primer and 0.2  $\mu\text{M}$  probe; cycling  
150 conditions were: 50  $^{\circ}\text{C}$  for 20 min, 95  $^{\circ}\text{C}$  for 5 min, and 40 cycles of 95  $^{\circ}\text{C}$  for 15 s and 62  $^{\circ}\text{C}$  for 30  
151 s.

152 For IDV, 8  $\mu\text{L}$  of template was used in a 25  $\mu\text{L}$  reaction using the AgPath-ID One-Step RT-  
153 PCR Reagents kit (Applied Biosystems) with 0.2  $\mu\text{M}$  each primer and 0.06  $\mu\text{M}$  probe; cycling  
154 conditions were 45  $^{\circ}\text{C}$  for 10 min, 95  $^{\circ}\text{C}$  for 10 min, and 40 cycles of 95  $^{\circ}\text{C}$  for 15 s and 64  $^{\circ}\text{C}$  for 45  
155 s.

156 For ICV, 3  $\mu\text{L}$  of template was used in a 20  $\mu\text{L}$  reaction using the Path-ID Multiplex One-  
157 Step RT-PCR Kit (Applied Biosystems) with 0.4  $\mu\text{M}$  of each primer and 0.2  $\mu\text{M}$  of each probe;  
158 cycling conditions were 48  $^{\circ}\text{C}$  for 10 min, 95  $^{\circ}\text{C}$  for 10 min, and 45 cycles of 95  $^{\circ}\text{C}$  for 15 s and 60  
159  $^{\circ}\text{C}$  for 45s.

### 160 **2.3 Viral RNA Standards.**

161 For IDV and ICV, standard curves of transcribed RNA template corresponding to each target  
162 (IDV *PBI* gene bases 1200 to 1600 and ICV *M* gene bases 545 to 1105) were generated. RNA was  
163 transcribed from PCR products encoding the desired bases downstream of a T7 promoter region  
164 using MEGAScript T7 Transcription Kit (Invitrogen, Carlsbad, CA) followed by purification using  
165 the MEGAClear Transcription Clean-Up Kit (Invitrogen) and quantification using a NanoDrop lite  
166 instrument (Thermo Scientific, Waltham, MA). To generate standard curves, serial 10-fold dilutions  
167 of transcription product ranging from  $10^{-1}$  to  $10^8$  copies were included in triplicate in each real-time  
168 RT-PCR assay. The limit of detection for the IDV assay was 1 copy (Ct value 38.5 to 40) and for  
169 ICV it was 100 copies (Ct value 39 to 40). Three technical replicates of standards were used in all  
170 real-time RT-PCR assays, as was a negative control of nuclease-free water. Unknown samples were  
171 tested in duplicate. The coefficient of variance for all specimens (samples and standards) was  $\text{Ct} <$   
172 0.03.

### 173 **2.4 Data analysis.**

174 Statistical analyses were performed using Prism version 8 (GraphPad, San Diego, CA).  
175 Mann-Whitney U tests were performed to compare clinical health scores between state cohorts, with  
176 two-tailed *p* values calculated. Viral copy numbers were determined by fitting Ct values to the  
177 standard curves generated using transcribed RNA representing the target sequence of each RT-PCR.  
178 The arithmetic mean values were calculated. To compare these lognormal-distributed viral copy data,

179 copy numbers were log transformed and a parametric t-test using Welch's correction was performed.  
180 In this analysis, one-tailed  $p$  values were calculated. Spearman correlations with two-tailed  $p$ -values  
181 were performed to correlate clinical scores with viral copy number; percentages were compared via a  
182 Fisher's exact test.

### 183 **3. Results**

#### 184 **3.1 Orthomyxovirus prevalence in cattle.**

185 IDV and ICV were detected in feedlot cattle from Colorado and Washington. However, no  
186 IDV or ICV was detected in the cohort from Holstein calves from New Mexico. The prevalence of  
187 IDV was similar in both feedlot cohorts (Colorado: 5.0%, Washington: 5.5%) (Table 1). The  
188 Colorado cohort demonstrated a lower prevalence of IDV in BRD cases compared with controls  
189 (cases: 3.0%, controls: 7.1%). The Washington cohort demonstrated a similar prevalence in control  
190 and case animals (cases: 6.0%, controls: 5.1%).

191 Notably, ICV was identified in more animals than was IDV (Table 1). The prevalence of ICV  
192 in the Colorado cohort overall was 15.5% and in the Washington cohort was 8.0%. ICV was detected  
193 in 14.1% of BRD cases in Colorado and 16.8% of controls (45.2% of ICV-positive animals were  
194 cases). In the Washington cohort, 3.0% of BRD cases and 13.1% of controls were ICV-positive, with  
195 only 18.8% of ICV-positive animals having high clinical BRD scores.

#### 196 **3.2 Orthomyxovirus RNA copies in BRD case or control cattle.**

197 Although the number of BRD case animals with detectable IDV RNA ( $n=9$ ) was lower than  
198 BRD controls ( $n=12$ ), mean Ct values (range: control 21.82 to 37.09, case 19.70 to 34.96) and  
199 corresponding log viral copy values were different between cases and controls. Viral copy numbers  
200 were 0.75 logs higher in BRD case animals (Figure 1A). The trend toward mean viral copy numbers  
201 being higher in BRD cases compared with controls approached statistical significance ( $p = 0.097$ )  
202 and this trend was the same in the overall result, as well as in both of the herds independently



203 (Colorado:  $p=0.20$ ; Washington:  $p=0.26$ ). In addition, a significant positive correlation was found  
204 between viral copy numbers and BRD score in the combined results ( $p=0.020$ ) and in the Colorado  
205 cohort ( $p=0.024$ ) (Table 2).

206 BRD case and control animals positive for ICV RNA both demonstrated a range of detectable  
207 Ct values (range: control 24.12 to 39.28, case 25.14 to 35.69) and copy numbers (Figure 1B). Similar  
208 to IDV, despite a higher prevalence of ICV in control cattle, the BRD case cattle mean viral copy  
209 levels were about 1 log greater, which was statistically significant in the combined cohort analysis  
210 ( $p=0.0004$ ). As shown in Table 3, a positive correlation was found between ICV viral copy number  
211 and BRD score, which was statistically significant in the combined cohort data (Spearman  $r$  value =  
212 0.44,  $p=0.0009$ ) and in each cohort separately (Colorado  $p=0.022$ , Washington  $p=0.044$ ), indicating  
213 that animals showing more severe clinical symptoms had more viral RNA extracted from nasal  
214 swabs.

### 215 **3.3 Association of viral presence with BRD symptoms.**

216 In addition to IDV and ICV, nasal swabs were screened for the five viruses most frequently  
217 associated with BRD namely PI3, BoHV-1, BCoV, BVDV, and BRSV. To determine if there was an  
218 association of viral presence and BRD symptoms, a Fisher's exact test was used to evaluate the  
219 significance of odds ratio values calculated between the presence of each virus and it is a BRD case  
220 animal. The analysis showed that PI3, BoHV-1, BCoV, BRSV, and BVDV displayed odds ratios  $>1$   
221 (Table 4), suggesting an association of the presence of each of these viruses with BRD clinical  
222 symptoms. Of these viruses, the odds ratios of BCoV and BRSV were statistically significant by  
223 Fisher's exact test ( $p=0.0007$  and  $p=0.0008$ , respectively), and that of BoHV-1 approached  
224 significance ( $p=0.061$ ). In contrast, the odds ratio for IDV was 0.74, indicating no association with  
225 BRD health status. For ICV, the odds ratio of the combined herds was 0.53, which approached  
226 statistical significance ( $p=0.062$ ), indicating a negative correlation between the presence of ICV and

227 the demonstration of BRD symptoms. Odds ratios of individual herds is provided in supplementary  
228 material (supplementary tables 1&2).

### 229 **3.4 Coinfections in BRD case and control animals.**

230 Each cohort investigated presented particular characteristics regarding sex, age, breed, and  
231 apparent association of viral infection with BRD clinical symptoms. While the cohort of female  
232 Holstein calves from New Mexico had a significant relationship between the presence of any virus  
233 and BRD symptoms ( $p=0.0027$ ), animals in the feedlot cohorts, either male or female, demonstrated  
234 a significant correlation between BRD symptoms and virus presence only when 2 or more viruses  
235 were detected in the nasal swab sample (Colorado, male,  $p=0.0008$ ; Washington, female,  $p=0.029$ ).  
236 However, when the association of viral infection with BRD case status was assessed without  
237 counting the presence of ICV or IDV, the feedlot cattle cohorts demonstrated a significant positive  
238 correlation when at least one virus was detected (Colorado, male,  $p=0.040$ ; Washington, female,  
239  $p=0.0008$ ; overall:  $p=0.0001$ ). This finding further suggests no association between ICV or IDV and  
240 BRD clinical symptoms in these populations.

241 Coinfection of ICV- or IDV-positive animals with other BRD-associated viruses occurred in  
242 22.4% of the orthomyxovirus-positive animals (Table 5). The most common virus in coinfection was  
243 BCoV (10 of the 15 coinfections). BVDV was found in coinfection in 6 of the coinfections. In the  
244 single case of coinfection with ICV and IDV, levels of both viruses were near the lower limit of  
245 detection (data not shown). ICV-positive BRD cases demonstrated a higher proportion of animals  
246 with viral coinfection compared with ICV-positive control animals ( $p=0.0016$  by Fisher's exact test),  
247 and a similar trend was observed in IDV-positive animals. In BRD case cattle, the geometric mean of  
248 detectable IDV viral RNA levels was nearly 2 logs higher in co-infected animals ( $1.30 \times 10^4$ ) than  
249 those only infected with IDV ( $2.19 \times 10^2$ ). However, ICV levels between these groups were similar to  
250 one another.

#### 251 **4. Discussion**

252           The disease of the respiratory tract in cattle is a leading cause of morbidity and mortality in  
253 the cattle industry in the US and around the world. Previous efforts to better understand the factors  
254 contributing to BRD have included genomic SNP associations, sequencing efforts, bacterial and viral  
255 associations, experimental infections with associated pathogens, as well as management  
256 interventions. Here, we discuss how the data arising from the largest case-control investigation  
257 examining the relationships among IDV, ICV, and BRD both support and dissent from this existing  
258 literature. Limitations and strengths of the different approaches are noted and directions for future  
259 research efforts are suggested.

260           Influenza D virus is relatively new, and it represents the first influenza virus to be closely  
261 associated with cattle (6). Indeed, cattle appear to be the reservoir of this virus, and it is known to  
262 have been present in North America since 2003 (27). ICV, which is primarily associated with disease  
263 in swine and humans, was also recently identified in North American cattle with and without BRD  
264 symptoms in the years 2015 to 2018 (10, 21). The results of this previous work provide reasonable  
265 evidence that coinfections do influence the observed highly variable clinical outcomes of BRD. More  
266 specifically, this literature provides strong evidence of higher morbidity and mortality in the event of  
267 mixed viral and bacterial infections (28). Cattle experimentally coinfecting with multiple BRD-  
268 associated viruses consistently demonstrate more severe respiratory disease and prolonged viral  
269 shedding (29-31). BRD cattle coinfecting with IDV and other viruses have been reported ICV, and  
270 one animal shedding IDV, ICV, BRSV, and BCoV (21). Ng *et al.* reported coinfection in six of seven  
271 IDV-positive cattle. All six coinfections were with a virus that was significantly associated with BRD  
272 in their analysis (9). In the cohorts utilized in the current study, the coinfection of IDV or ICV with  
273 other BRD-associated viruses was more frequent in symptomatic (12 out of 26 IDV/ICV-positive)  
274 versus asymptomatic (4 out of 42 IDV/ICV-positive) animals. The most common viruses found to be  
275 in coinfections with IDV were BCoV and BVDV (each in three of the six coinfections). ICV positive

276 animals had coinfections with BCoV in seven of the nine cases and BVDV in three of nine  
277 individuals. These results strongly suggest that these orthomyxoviruses may be significant  
278 contributors to BRD by facilitating coinfections with other bovine pathogens. More strikingly, in  
279 BRD-symptomatic cattle, the geometric mean of detectable IDV viral RNA levels were nearly 2 logs  
280 higher in co-infected animals ( $1.30 \times 10^4$ ) than those only infected with IDV ( $2.19 \times 10^2$ ). This is strong  
281 evidence that coinfection with other viruses can lead to higher replication of IDV.

282 Previous studies have examined potential correlations between IDV presence and BRD  
283 symptoms and have found positive correlations with varying statistical significance. Ng *et al.*  
284 examined Californian Holstein calves (July 2011-January 2012) ages 27-60 days (9). Here, the RT-  
285 PCR method used did not include a quantitation control, so the limit of detection was unknown.  
286 Samples were reported as positive with Ct values as high as 40.39 (range 27.84 – 40.39, median  
287 33.85). A high odds ratio based on RT-PCR results from 50 subjects of each health status was found  
288 to suggest a correlation between IDV infection and BRD symptoms, with 8 of 50 (16%) symptomatic  
289 cattle showing IDV and 0 of 50 asymptomatic animals showing ICV. Direct comparisons between  
290 the Ng *et al.* study and the current study are problematic since pathogen profiles of these 2 cohorts  
291 were different (23). Indeed, more than half of the 100 BRD case calves and one-third of control  
292 calves assayed in the current work had detectable BCoV (data not shown), but no BCoV RNA was  
293 detected in the viral metagenomic screening of the California calf cohort (9). Differences in the  
294 cohort makeup, as well as the herd management practices from these two populations may have  
295 contributed to the lack of detection of IDV in the current calf cohort. These differing results reflect  
296 the multifactorial nature of BRD.

297 Previous research often assayed pooled samples from different sites with variable  
298 management practices. Zhang *et al.* showed there is a wide range of BRD-associated virus prevalence  
299 associated with multiple feedlot locations (10). The current study is robust to this problem. Indeed,

300 the analysis of large sample sizes (n=100) from two specific sights led to the same conclusions  
301 regarding the IDV and ICV correlations with BRD symptoms.

302 Mitra *et al.* used both metagenomics and real-time RT-PCR to detect IDV from steer at  
303 feedlots in the US state of Kansas (4 lots, total 40 animals) and multiple Mexican states (6 lots, total  
304 53 animals) in 2015. Cattle typically enter feedlots between 4 to 6 months of age in North America.  
305 IDV was detected in one asymptomatic animal and 8 (29.6%) BRD case animals from Mexican  
306 feedlots. Using an exclusive metagenomics approach, Zhang *et al.* found a similar result of a  
307 significantly higher prevalence of IDV in samples from 58 case steer compared with 58 control steer  
308 collected from multiple feedlots in Alberta, Canada, between November 2015 and January 2016.  
309 However, in contrast to these findings supporting correlations between BRD and IDV, in the Kansas  
310 feedlots, the opposite was observed: Mitra *et al.* found IDV in only 2 asymptomatic cattle. This result  
311 is consistent with the current findings based on samples from nearly 400 individual animals from  
312 IDV-positive populations. Here, among nearly 400 individual animals from 2 different US feedlots,  
313 there was no significant evidence for higher IDV prevalence in BRD symptomatic cattle when  
314 compared with BRD asymptomatic cattle. These different correlation results amongst studies may be  
315 related to the vastly different scoring systems used to classify animals as case or control. The location  
316 (country), management practices, sampling year, age, season, and sample sizes used may all  
317 contribute to the between study correlational differences observed.

318 To date, only one other case-control study investigating both IDV and ICV in cattle has been  
319 reported (10). This metagenomics study, described above, found no ICV in BRD case cattle but  
320 identified several control animals with ICV. Their results agree with our finding of ICV in healthy  
321 cattle, and a higher prevalence in control animals than in cases.

322 Although more prevalent in healthy cattle, in the current study ICV RNA levels were  
323 significantly lower in BRD asymptomatic cattle, and IDV RNA levels showed a trend in this

324 direction, as well. This result is in agreement with previous observations of IDV RNA levels in sick  
325 and healthy cattle (2, 32). The relative abundance of virus in each health status was not reported for  
326 ICV in the only other cattle ICV case-control report (10). Taken together, these results suggest that  
327 the level of orthomyxovirus infection may be of more relevance to BRD clinical symptoms rather  
328 than the simple presence or absence of viral RNA. It is also possible that IDV- and ICV-positive  
329 BRD control animals represent cattle with subclinical BRD. This prospect is consistent with the  
330 identification of IDV in a pig with subclinical infection in the US (33) and the observation that IDV  
331 causes only mild upper respiratory infection under experimental conditions (6, 17-20). Subclinical  
332 BRD has been identified in feedlot cattle following slaughter based on lung lesion presence and was  
333 associated with the presence of BoHV-1 in nasal-pharyngeal swabs (34). It is possible that IDV  
334 could also contribute to lung damage, as there was evidence of deep respiratory tract disease in naïve  
335 calves following experimental infection with IDV (18-20).

336 Unlike previous reports including several instances of coinfection of cattle with both ICV and  
337 IDV (10, 21), only one such case was identified in the current study. Previous reports of ICV with  
338 IDV coinfection were from samples obtained from 2014 and beyond, so this finding may be due to  
339 different viral dynamics during this current study (2011 to 2014). Coinfection of cattle with IDV and  
340 at least one other BRD-associated virus occurred in 55.6% of IDV-positive BRD case cattle in the  
341 current study. This is similar to the 72.2% identified by Flynn *et al* using an RT-PCR method of IDV  
342 identification (14).

343 Overall, a similar prevalence of RT-PCR-identified IDV and ICV was found in the BRD case  
344 and control cattle in both orthomyxovirus-positive herds tested in this study. It has been suggested (9,  
345 14, 17) that the main role of IDV in respiratory disease is contributing to effects initiated by infection  
346 with other pathogens associated with respiratory disease in cattle. The results of this study provide  
347 further evidence to support this hypothesis. The results here suggest that while neither IDV nor ICV

348 causes BRD directly, these orthomyxoviruses are better able to replicate in cattle with another viral  
349 respiratory infection and as such may contribute to illness in BRD. Increased replication of IDV or  
350 ICV may contribute to BRD through tissue damage. Following experimental infection of calves, IDV  
351 can be detected in samples of nasal swabs, tracheal swabs, and bronchoalveolar lavage fluid, as well  
352 as in tissues including nasal turbinate, trachea, bronchus, and lung (17-20). Inflammation in the  
353 trachea, as evidenced by neutrophil infiltration and mild epithelial attenuation, has been observed in  
354 multiple studies of experimental IDV infection in cattle (17, 19, 20). To a lesser degree, lesions have  
355 also been observed in lung tissue in some studies (18-20).

356 Besides physical tissue damage, the coinfection of the bovine respiratory tract with IDV  
357 and/or ICV and another virus may affect the viral replication efficiency of all coinfecting viruses. For  
358 example, in humans, infection by rhinovirus, the fastest-growing virus, reduces replication of the  
359 remaining viruses during a coinfection, while parainfluenza virus, the slowest-growing virus is  
360 suppressed in the presence of other viruses (35). Subsequently, the host is subject to the effects of the  
361 prevailing virus.

362 An interesting alternative possible mechanism for IDV or ICV orthomyxoviruses to affect  
363 BRD pathogenesis is through disruption of the bovine immune system. Viruses employ diverse  
364 tactics to subvert the host immune responses. For example, influenza A viruses (IAVs) can  
365 dysregulate innate immune antiviral responses in certain target cells, which promotes persistent IAV  
366 circulation in asymptomatic reservoir hosts (36-38). Particularly because IDV can be found in  
367 asymptomatic cattle, it is intriguing to consider if similar action is performed by this orthomyxovirus.  
368 A recent study showed that IDV infection could lead to suppression of cytokine production in cattle.  
369 In bronchioalveolar fluid collected two days after IDV infection, calves demonstrated upregulation of  
370 two negative regulators of cytokine production (SOCS1 and SOCS3), and the proinflammatory type  
371 one interferon pathway was decidedly unaffected (18). By suppressing immunity in the bovine

372 respiratory tract, IDV may promote an environment permissive to other viral infections, thus  
373 promoting their establishment and facilitating the development of the disease. Delineation of the  
374 mechanism of orthomyxovirus infection of cattle leading to BRD should focus on characterizing the  
375 effects of IDV or ICV infection on bovine innate immunity.

376         Too often infections are studied in isolation when in reality there are most often multiple  
377 infections that all interact with the host immune system and this amalgamation results in the  
378 manifestation of the disease. As a consequence of this, the scientific community needs to embrace  
379 this added complexity as it will be necessary to clearly understand not only the infection process but  
380 also the manifestation of the disease. This approach should also inform the development of novel  
381 intervention methods. Studying processes like virus community assembly and identifying rules of  
382 the assembly could aid in the development of optimal and sustainable strategies for long term  
383 management of both animal health and productivity. This may also lead to more efficient and  
384 effective use of vaccines and antibiotics. The necessary factorial infection experiments needed to  
385 disentangle the relative roles of all of these infectious agents would be laborious and expensive.  
386 However, given the financial burden of BRD and subclinical BRD on nearly 100 million US cattle  
387 and millions more around the world, the economics warrant the availability of funding to accomplish  
388 this important animal health issue.

389

## 390 **5. Author contributions**

391 SVK conceived of the study and designed experiments. JNK and HLN conducted specimen  
392 collection. RHN, NZ, PASI, LL, KM, and JNK conducted experiments. RHN and JNK analyzed the  
393 data. IB, GLB, and SKC contributed to experiments and data analysis. RHN, KV and SVK wrote the  
394 manuscript.



## 395 **6. Funding**

396 This work was supported by funding from the Penn State University Department of Veterinary and  
397 Biomedical Sciences and from the Pennsylvania Department of Agriculture (#000206603) to Suresh  
398 V. Kuchipudi. Kurt Vandegrift was supported by a grant from The National Science Foundation's  
399 Ecology and Evolution of Infectious Diseases program (#1619072).

## 400 **7. Conflict of interest**

401 The authors declare no conflicts of interest.

## 402 **References**

- 403 1. Hilton WM. 2014. BRD in 2014: where have we been, where are we now, and where do we  
404 want to go? *Anim Health Res Rev* 15:120-2.
- 405 2. Mitra N, Cernicchiaro N, Torres S, Li F, Hause BM. 2016. Metagenomic characterization of  
406 the virome associated with bovine respiratory disease in feedlot cattle identified novel viruses  
407 and suggests an etiologic role for influenza D virus. *J Gen Virol* 97:1771-84.
- 408 3. Portis E, Lindeman C, Johansen L, Stoltman G. 2012. A ten-year (2000-2009) study of  
409 antimicrobial susceptibility of bacteria that cause bovine respiratory disease complex--  
410 *Mannheimia haemolytica*, *Pasteurella multocida*, and *Histophilus somni*--in the United States  
411 and Canada. *J Vet Diagn Invest* 24:932-44.
- 412 4. Nickell JS, White BJ. 2010. Metaphylactic antimicrobial therapy for bovine respiratory  
413 disease in stocker and feedlot cattle. *Vet Clin North Am Food Anim Pract* 26:285-301.
- 414 5. Mosier D. 2014. Review of BRD pathogenesis: the old and the new. *Anim Health Res Rev*  
415 15:166-8.
- 416 6. Hause BM, Collin EA, Liu R, Huang B, Sheng Z, Lu W, Wang D, Nelson EA, Li F. 2014.  
417 Characterization of a novel influenza virus in cattle and Swine: proposal for a new genus in  
418 the Orthomyxoviridae family. *MBio* 5:e00031-14.
- 419 7. Collin EA, Sheng Z, Lang Y, Ma W, Hause BM, Li F. 2015. Cocirculation of two distinct  
420 genetic and antigenic lineages of proposed influenza D virus in cattle. *J Virol* 89:1036-42.
- 421 8. Ferguson L, Eckard L, Epperson WB, Long LP, Smith D, Huston C, Genova S, Webby R,  
422 Wan XF. 2015. Influenza D virus infection in Mississippi beef cattle. *Virology* 486:28-34.
- 423 9. Ng TF, Kondov NO, Deng X, Van Eenennaam A, Neibergs HL, Delwart E. 2015. A  
424 metagenomics and case-control study to identify viruses associated with bovine respiratory  
425 disease. *J Virol* 89:5340-9.
- 426 10. Zhang M, Hill JE, Fernando C, Alexander TW, Timsit E, van der Meer F, Huang Y. 2019.  
427 Respiratory viruses identified in western Canadian beef cattle by metagenomic sequencing  
428 and their association with bovine respiratory disease. *Transbound Emerg Dis* 66:1379-1386.
- 429 11. Chiapponi C, Faccini S, De Mattia A, Baioni L, Barbieri I, Rosignoli C, Nigrelli A, Foni E.  
430 2016. Detection of Influenza D Virus among swine and cattle, Italy. *Emerg Infect Dis* 22:352-  
431 4.

- 432 12. Dane H, Duffy C, Guelbenzu M, Hause B, Fee S, Forster F, McMenemy MJ, Lemon K. 2019.  
433 Detection of influenza D virus in bovine respiratory disease samples, U.K. *Transbound*  
434 *Emerg Dis* doi:10.1111/tbed.13273.
- 435 13. Ducatez MF, Pelletier C, Meyer G. 2015. Influenza D virus in cattle, France, 2011-2014.  
436 *Emerg Infect Dis* 21:368-71.
- 437 14. Flynn O, Gallagher C, Mooney J, Irvine C, Ducatez M, Hause B, McGrath G, Ryan E. 2018.  
438 Influenza D Virus in Cattle, Ireland. *Emerg Infect Dis* 24:389-391.
- 439 15. Zhai SL, Zhang H, Chen SN, Zhou X, Lin T, Liu R, Lv DH, Wen XH, Wei WK, Wang D, Li  
440 F. 2017. Influenza D Virus in Animal Species in Guangdong Province, Southern China.  
441 *Emerg Infect Dis* 23:1392-1396.
- 442 16. Murakami S, Endoh M, Kobayashi T, Takenaka-Uema A, Chambers JK, Uchida K, Nishihara  
443 M, Hause B, Horimoto T. 2016. Influenza D Virus Infection in Herd of Cattle, Japan. *Emerg*  
444 *Infect Dis* 22:1517-9.
- 445 17. Ferguson L, Olivier AK, Genova S, Epperson WB, Smith DR, Schneider L, Barton K,  
446 McCuan K, Webby RJ, Wan XF. 2016. Pathogenesis of Influenza D Virus in Cattle. *J Virol*  
447 90:5636-5642.
- 448 18. Salem E, Hagglund S, Cassard H, Corre T, Naslund K, Foret C, Gauthier D, Pinard A,  
449 Delverdier M, Zohari S, Valarcher JF, Ducatez M, Meyer G. 2019. Pathogenesis, Host Innate  
450 Immune Response, and Aerosol Transmission of Influenza D Virus in Cattle. *J Virol* 93.
- 451 19. Zhang X, Outlaw C, Olivier AK, Woolums A, Epperson W, Wan XF. 2019. Pathogenesis of  
452 co-infections of influenza D virus and *Mannheimia haemolytica* in cattle. *Vet Microbiol*  
453 231:246-253.
- 454 20. Hause BM, Huntimer L, Falkenberg S, Henningson J, Lechtenberg K, Halbur T. 2017. An  
455 inactivated influenza D virus vaccine partially protects cattle from respiratory disease caused  
456 by homologous challenge. *Vet Microbiol* 199:47-53.
- 457 21. Zhang H, Porter E, Lohman M, Lu N, Peddireddi L, Hanzlicek G, Marthaler D, Liu X, Bai J.  
458 2018. Influenza C Virus in Cattle with Respiratory Disease, United States, 2016-2018. *Emerg*  
459 *Infect Dis* 24:1926-1929.
- 460 22. Zhang H, Porter EP, Lohman M, Lu N, Peddireddi L, Hanzlicek G, Marthaler D, Liu X, Bai J.  
461 2018. Complete Genome Sequence of an Influenza C Virus Strain Identified from a Sick Calf  
462 in the United States. *Microbiol Resour Announc* 7.
- 463 23. Neibergs HL, Seabury CM, Wojtowicz AJ, Wang Z, Scraggs E, Kiser JN, Neupane M,  
464 Womack JE, Van Eenennaam A, Hagevoort GR, Lehenbauer TW, Aly S, Davis J, Taylor JF,  
465 Bovine Respiratory Disease Complex Coordinated Agricultural Project Research T. 2014.  
466 Susceptibility loci revealed for bovine respiratory disease complex in pre-weaned holstein  
467 calves. *BMC Genomics* 15:1164.
- 468 24. Neupane M, Kiser JN, Bovine Respiratory Disease Complex Coordinated Agricultural Project  
469 Research T, Neibergs HL. 2018. Gene set enrichment analysis of SNP data in dairy and beef  
470 cattle with bovine respiratory disease. *Anim Genet* 49:527-538.
- 471 25. Fulton RW, Neill JD, Saliki JT, Landis C, Burge LJ, Payton ME. 2017. Genomic and  
472 antigenic characterization of bovine parainfluenza-3 viruses in the United States including  
473 modified live virus vaccine (MLV) strains and field strains from cattle. *Virus Res* 235:77-81.
- 474 26. Faccini S, De Mattia A, Chiapponi C, Barbieri I, Boniotti MB, Rosignoli C, Franzini G,  
475 Moreno A, Foni E, Nigrelli AD. 2017. Development and evaluation of a new Real-Time RT-  
476 PCR assay for detection of proposed influenza D virus. *J Virol Methods* 243:31-34.
- 477 27. Luo J, Ferguson L, Smith DR, Woolums AR, Epperson WB, Wan XF. 2017. Serological  
478 evidence for high prevalence of Influenza D Viruses in Cattle, Nebraska, United States, 2003-  
479 2004. *Virology* 501:88-91.

- 480 28. Duff GC, Galyean ML. 2007. Board-invited review: recent advances in management of  
481 highly stressed, newly received feedlot cattle. *J Anim Sci* 85:823-40.
- 482 29. Potgieter LN, McCracken MD, Hopkins FM, Walker RD. 1984. Effect of bovine viral  
483 diarrhoea virus infection on the distribution of infectious bovine rhinotracheitis virus in calves.  
484 *Am J Vet Res* 45:687-90.
- 485 30. Elvander M, Baule C, Persson M, Egyed L, Ballagi-Pordany A, Belak S, Alenius S. 1998. An  
486 experimental study of a concurrent primary infection with bovine respiratory syncytial virus  
487 (BRSV) and bovine viral diarrhoea virus (BVDV) in calves. *Acta Vet Scand* 39:251-64.
- 488 31. Brodersen BW, Kelling CL. 1999. Alteration of leukocyte populations in calves concurrently  
489 infected with bovine respiratory syncytial virus and bovine viral diarrhoea virus. *Viral*  
490 *Immunol* 12:323-34.
- 491 32. Mekata H, Yamamoto M, Hamabe S, Tanaka H, Omatsu T, Mizutani T, Hause BM,  
492 Okabayashi T. 2018. Molecular epidemiological survey and phylogenetic analysis of bovine  
493 influenza D virus in Japan. *Transbound Emerg Dis* 65:e355-e360.
- 494 33. Thielen P, Nolting JM, Nelson SW, Mehoke TS, Howser C, Bowman AS. 2019. Complete  
495 Genome Sequence of an Influenza D Virus Strain Identified in a Pig with Subclinical  
496 Infection in the United States. *Microbiol Resour Announc* 8.
- 497 34. Kiser JN, Lawrence TE, Neupane M, Seabury CM, Taylor JF, Womack JE, Neiberghs HL.  
498 2017. Rapid Communication: Subclinical bovine respiratory disease - loci and pathogens  
499 associated with lung lesions in feedlot cattle. *J Anim Sci* 95:2726-2731.
- 500 35. Pinky L, Dobrovoly HM. 2016. Coinfections of the Respiratory Tract: Viral Competition for  
501 Resources. *PLoS One* 11:e0155589.
- 502 36. Kuchipudi SV, Tellabati M, Sebastian S, Londt BZ, Jansen C, Vervelde L, Brookes SM,  
503 Brown IH, Dunham SP, Chang KC. 2014. Highly pathogenic avian influenza virus infection  
504 in chickens but not ducks is associated with elevated host immune and pro-inflammatory  
505 responses. *Vet Res* 45:118.
- 506 37. Chang P, Kuchipudi SV, Mellits KH, Sebastian S, James J, Liu J, Shelton H, Chang KC.  
507 2015. Early apoptosis of porcine alveolar macrophages limits avian influenza virus replication  
508 and pro-inflammatory dysregulation. *Sci Rep* 5:17999.
- 509 38. Ramos I, Fernandez-Sesma A. 2015. Modulating the Innate Immune Response to Influenza A  
510 Virus: Potential Therapeutic Use of Anti-Inflammatory Drugs. *Front Immunol* 6:361.

511  
512  
513  
514  
515  
516

## 517 8. Figure legends

518 **Figure 1:** Viral RNA copy numbers from RT-PCR targeting influenza D (A) or influenza C (B)  
519 viruses were measured from nasal swabs collected from cattle demonstrating BRD symptoms (cases)  
520 or apparently healthy (controls). Each sample is represented by a circle; horizontal dotted line  
521 represents geometric mean of each population.

522 <<<<Fig 1 is attached as a separate file>>>>

523

524

525

526 **Table 1.** Significant differences ( $p < 0.05$ ) are denoted by values with different letters).

527

528

| State      | Sex    | Time period               | Average clinical score of cases $\pm$ SEM | Average clinical score of controls $\pm$ SEM | # tested (total/cases) | # IDV positive (total/cases) | # ICV positive (total / cases) |
|------------|--------|---------------------------|-------------------------------------------|----------------------------------------------|------------------------|------------------------------|--------------------------------|
| Colorado   | Male   | September – November 2012 | <sup>a</sup> 7.99 $\pm$ 0.13              | <sup>a</sup> 2.13 $\pm$ 0.034                | 200 / 101              | 10 / 3                       | 31 / 14                        |
| Washington | Female | January – July 2014       | <sup>b</sup> 9.51 $\pm$ 0.13              | <sup>b</sup> 2.43 $\pm$ 0.076                | 199 / 100              | 11 / 6                       | 16 / 3                         |
| New Mexico | Female | August – October 2011     | <sup>a</sup> 8.15 $\pm$ 0.15              | <sup>a</sup> 1.79 $\pm$ 0.095                | 200 / 100              | 0 / 0                        | 0 / 0                          |

529

530

531

532

533

534

535

536 **Table 2.** The correlation between Influenza D viral copies and the clinical health scores.

| Cohort   | Spearman r | 95% CI        | P value (one-tailed) |
|----------|------------|---------------|----------------------|
| CO       | 0.65       | incalculable  | 0.024 (exact)        |
| WA       | 0.29       | -0.39 to 0.77 | 0.19 (exact)         |
| Combined | 0.45       | 0.013 to 0.75 | 0.020 (approx.)      |

537

538

539 **Table 3. The correlation between Influenza C viral copies and clinical health score**

| <b>Cohort</b> | <b>Spearman r</b> | <b>95% CI</b>    | <b>P value (one-tailed)</b> |
|---------------|-------------------|------------------|-----------------------------|
| CO            | 0.36              | -0.00073 to 0.64 | 0.022 (approx.)             |
| WA            | 0.44              | -0.084 to 0.78   | 0.044 (exact)               |
| Combined      | 0.44              | 0.17 to 0.65     | 0.0009 (approx.)            |

540

541

542

543

544

545

546 **Table 4. Odds ratio of viruses with Bovine Respiratory Disease “case” status in combined**  
 547 **results.**

| <b>Agent</b>               | <b>% positive cases (controls)</b> | <b>Odds Ratio</b> | <b>OR 95% Confidence interval (Baptista-Pike)</b> | <b>p value (Fisher's exact)</b> |
|----------------------------|------------------------------------|-------------------|---------------------------------------------------|---------------------------------|
| ICV                        | 8.5 (15.0)                         | 0.53              | 0.28 to 1.01                                      | 0.062                           |
| IDV                        | 4.5 (6.0)                          | 0.74              | 0.30 to 1.73                                      | 0.65                            |
| BVDV                       | 7.0 (5.0)                          | 1.44              | 0.64 to 3.25                                      | 0.40                            |
| PI3                        | 2.5 (1.5)                          | 1.69              | 0.44 to 6.46                                      | 0.50                            |
| BCoV                       | 24.6 (11.6)                        | 2.51              | 1.46 to 4.31                                      | 0.0007                          |
| BRSV                       | 6.5 (0.5)                          | 13.91             | 2.22 to 149.10                                    | 0.0008                          |
| BHV-1*only in case from WA | 2.0 (0)                            | ∞                 | 1.01 to ∞                                         | 0.061                           |

548

549

550

551

552

553

554 **Table 5. Coinfections of Influenza C and/or Influenza D positive cattle with other viruses. No**

555 **animals were co-infected with with BHV-1 of P13.**

| <b>Animal ID/State</b> | <b>Clinical Score</b> | <b>IDV</b> | <b>ICV</b> | <b>BCV</b> | <b>BRSV</b> | <b>BVDV</b>      |
|------------------------|-----------------------|------------|------------|------------|-------------|------------------|
| 5664 / CO              | 9                     | X          |            |            |             | X                |
| 5722 / CO              | 9                     | X          |            |            |             | X <sup>557</sup> |
| 5769 / CO              | 3                     | X          |            | X          | X           | X                |
| 6799 / WA              | 10                    | X          |            | X          |             | 558              |
| 6715 / WA              | 10                    | X          |            |            | X           |                  |
| 6710 / WA              | 3                     | X          | X          |            |             | 559              |
| 6522 / WA              | 8                     | X          |            | X          |             |                  |
| 6624 / WA              | 9                     |            | X          | X          |             | 560              |
| 5824 / CO              | 9                     |            | X          | X          |             | X                |
| 5860 / CO              | 8                     |            | X          |            | X           | 561              |
| 5704 / CO              | 7                     |            | X          | X          |             |                  |
| 5796 / CO              | 9                     |            | X          | X          |             | 562              |
| 5836 / CO              | 10                    |            | X          | X          |             | X                |
| 5718 / CO              | 8                     |            | X          | X          |             | 563              |
| 5753 / CO              | 2                     |            | X          |            |             | X                |
| 5691 / CO              | 2                     |            | X          | X          |             | 564              |

565

566

567

568

569

**A**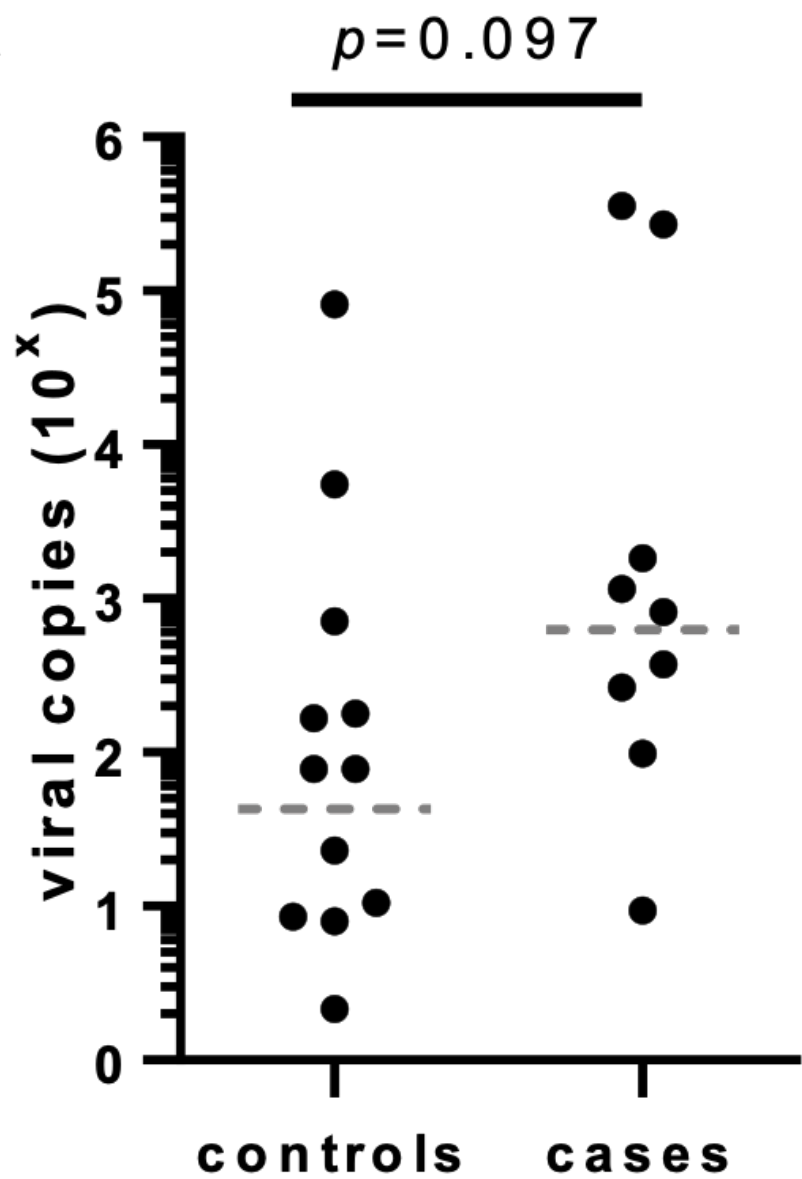**B**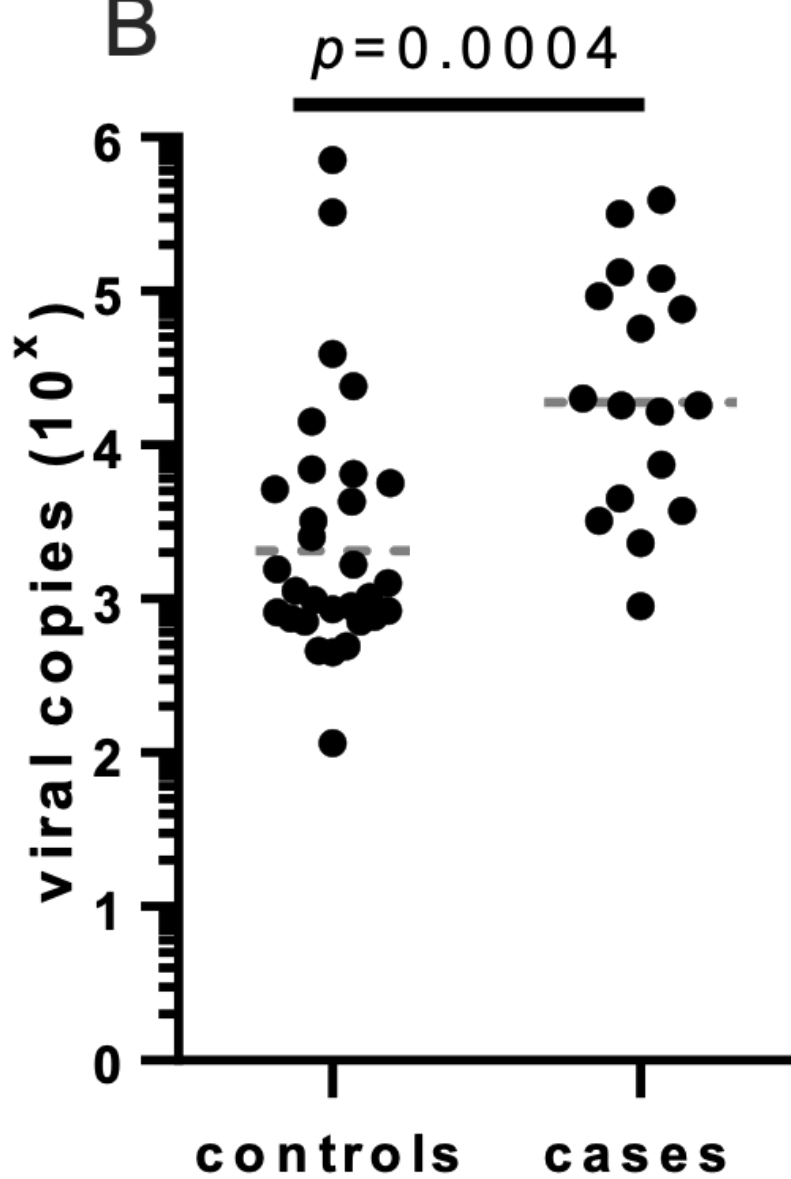

Source: http://biorxiv.org/content/10.1101/2020.05.26.118166v1.full.pdf
